# Supplementary material
Source: PubMed Central journal article supplement (PMC2804935)

**Supplementary Table 1.** Clinical Characteristics & Demographics (5).

|                            |             |
|----------------------------|-------------|
| <b>Age</b>                 |             |
| Mean (SD)                  | 71.3 (8.26) |
| Median                     | 70.0        |
| Range                      | (56.0-87.0) |
|                            |             |
| <b>HER 2</b>               |             |
| Missing                    | 16          |
| 0                          | 16          |
| 1                          | 5           |
| 2                          | 1           |
| 3                          | 7           |
|                            |             |
| <b>T Stage</b>             |             |
| T2                         | 35 (77.8%)  |
| T3                         | 3 (6.7%)    |
| T4                         | 6 (13.3%)   |
| T4b                        | 1 (2.2%)    |
|                            |             |
| <b>Aromatase Inhibitor</b> |             |
| Anastrozole                | 21 (46.7%)  |
| Exemestane                 | 10 (22.2%)  |
| Letrozole                  | 14 (31.1%)  |

**Supplementary Table 2. CYP19 Resequencing Primers**

|                    | Forward (F) or Reverse (R) | M13 Tag Sequence   | Primer Sequence           | T <sub>a</sub> (C) |
|--------------------|----------------------------|--------------------|---------------------------|--------------------|
| Exon 1.1           | F                          |                    | CCAACAAAAGCACAAAGGAAA     | 64                 |
|                    | R                          |                    | TATCCAGCACACAACATCAGC     |                    |
| Exon 2a            | F                          |                    | TAAAAATGAAGCTGCCACTCTCT   | 58                 |
|                    | R                          |                    | TTATGGTCTTAAGCATGGCTTTG   |                    |
| Exon 1.4           | F                          |                    | TGAAGGGAGAATAATTGGGAAC    | 58                 |
|                    | R                          |                    | GGTAGCCTAAGCCGTCCTTC      |                    |
| Exon 1.5           | F                          |                    | CCCTCTCTTTTCCGAGGTG       | 63                 |
|                    | R                          |                    | CCCGAATCTTGACATTTGCT      |                    |
| Exon 1.7           | F                          |                    | GCCCTCTCCTTTCTCAGGAC      | 57                 |
|                    | R                          |                    | TGTCACCTCGAAAGGGGCTAC     |                    |
| Exon 1.f           | F                          | TGTA AACGACGGCCAGT | GGTTCTGCTTTGCAACTTCTCT    | 55                 |
|                    | R                          | CAGGAAACAGCTATGACC | GAACGATGCAACCTGTTGGT      |                    |
| Exon 1.2           | F                          | TGTA AACGACGGCCAGT | ACCCTTTTCTGGGGAGTT        | 55                 |
|                    | R                          |                    | ACTCCCCGAGGCTAATAAAAAGT   |                    |
| Exon 1.6           | F                          |                    | ATATTTCCCTCCTGCTCCTTCT    | 55                 |
| Exon 1.3<br>Exon 2 | R                          | CAGGAAACAGCTATGACC | ATTACGGTTACAGGGGGTCTTT    |                    |
| Exon 3             | F                          | TGTA AACGACGGCCAGT | TTCATTTAACAAGCTGCCTCTTACT | 55                 |
|                    | R                          |                    | AGCACATGAATCTTTAGAGAACACA |                    |
| Exon 4             | F                          |                    | GCACTTGAAGCCAGAGTTCAC     | 57                 |
|                    | R                          | CAGGAAACAGCTATGACC | CCCTCCTCTCCCCTCTTAACT     |                    |
| Exon 5             | F                          |                    | CAATACCTGTGGGTGTCTTGG     | 55                 |
|                    | R                          |                    | TTCCCATTTTATGGGCAGT       |                    |
| Exon 6             | F                          |                    | TTGAATAAACTGTGTAGCGCAGA   | 56                 |
|                    | R                          |                    | CACCTGTATTCACCTGACTCTCC   |                    |
| Exon 7             | F                          |                    | AAAAACACAAGAGGGTTTGTGAGT  | 55                 |
| Exon 8             | R                          |                    | TCTATTTCCAGTTTGCCTAGATCC  |                    |
| Exon 9             | F                          |                    | CCAAGATGCAGGAAGTTTAAGG    | 56                 |
|                    | R                          |                    | TGGTGTCACTTACTGTGCCTTT    |                    |
| Exon 10            | F                          |                    | ATCCCAACCCAACTGTTGA       | 59                 |
|                    | R                          |                    | TCCTGAAGCAGGGGTAACCTC     |                    |

**Supplementary Table 3.** Primers for site-direct mutagenesis and EMSA probes. Nucleotides that are underlined represent the restriction enzyme site. SNPs are highlighted for site-directed mutagenesis and for EMSA probes.

Site-directed mutagenesis His (128)Arg, (A->G; CAT->CGT)

**Primer Sense:** 5'-AGTGCATCGGTATGCGTGAGAAAGGCATCAT

Primer Anti-sense: 5'-ATGATGCCTTTCTCACGCATACCGATGCACT

Reporter gene constructs:

**Primer Sense:** **gtca acgcgt** GACTGATCAT CTCTCAGCAA TACCCAC

**Primer Anti-sense:** **catg ctcgag** CCAACACTATCTACCTGGAAAGAGT

EMS Assay Probes (-588, -144)

P1.1 -588 wild-type Sense: 5'-TCA CTA TTA CCC **GTT** GAA TAA ATG AG

P1.1 -588 wild-type Anti-sense: 5'-CTC ATT TAT TCA ACG GGT AAT AGT GA

P1.1 -588 A variant Sense: 5'-TCA CTA TTA CCC **ATT** GAA TAA ATG AG

P1.1 -588 A variant Anti-sense: 5'-CTC ATT TAT TCA **ATG** GGT AAT AGT GA

P1.1 -144 wild-type Sense: 5'-AGT CAT GGA CAA **CAA** ATG AAA TCTC

P1.1 -144 wild-type Anti-sense: 5'-GAG ATT TCA TTT **GTT** GTC CAT GACT

P1.1 -144 T-variant Sense: 5'-AGT CAT GGA CAA **TAA** ATG AAA TCTC

P1.1 -144 T-variant Anti-sense: 5'-GAG ATT TCA TTT **ATT** GTC CAT GACT

| Location             | Nucleotide   | Sequence Change         | Amino Acid Change | Coriell Caucasian n=60 | Edinburgh Tissue Samples (tumor and normal) n=52 |
|----------------------|--------------|-------------------------|-------------------|------------------------|--------------------------------------------------|
| <b>5'FR Exon I.1</b> | <b>-588</b>  | <b>G→A</b>              |                   | <b>0.142</b>           | 0.154                                            |
| 5'FR Exon I.1        | -245         | G→T                     |                   | 0.008                  | 0.000                                            |
| <b>5'FR Exon I.1</b> | <b>-144</b>  | <b>C→T</b>              |                   | <b>0.158</b>           | 0.154                                            |
| 5'FR Exon 2a         | -639         | G→A                     |                   | 0.008                  | 0.000                                            |
| 5'FR Exon 2a         | -602         | C→T                     |                   | 0.000                  | 0.010                                            |
| <b>5'FR Exon 2a</b>  | <b>-468</b>  | <b>C→T</b>              |                   | <b>0.175</b>           | 0.125                                            |
| 5'FR Exon 2a         | -429         | T→C                     |                   | 0.042                  | 0.029                                            |
| Exon 2a              | -21          | C→A                     |                   | 0.008                  | 0.000                                            |
| <b>5'FR Exon I.5</b> | <b>-628</b>  | <b>C→G</b>              |                   | <b>0.867</b>           | 0.192                                            |
| <b>5'FR Exon I.5</b> | <b>-334</b>  | <b>T→C</b>              |                   | <b>0.050</b>           | 0.029                                            |
| <b>5'FR Exon I.5</b> | <b>-317</b>  | <b>G→C</b>              |                   | <b>0.092</b>           | 0.154                                            |
| <i>5'FR Exon I.7</i> | <i>-1051</i> | <i>deletion of CTTT</i> |                   | <i>0.092</i>           | 0.154                                            |
| <i>5'FR Exon I.7</i> | <i>-1000</i> | <i>deletion of CTT</i>  |                   | <i>0.010</i>           | 0.063                                            |
| <i>5'FR Exon I.7</i> | <i>-787</i>  | <i>C→T</i>              |                   | <i>0.104</i>           | 0.026                                            |
| <i>5'FR Exon I.7</i> | <i>-734</i>  | <i>A→G</i>              |                   | <i>0.008</i>           | 0.010                                            |
| 5'FR Exon I.7        | -439         | A→C                     |                   | 0.008                  | 0.010                                            |
| <b>Intron I.7</b>    | <b>54</b>    | <b>G→C</b>              |                   | <b>0.058</b>           | 0.038                                            |
| <i>Intron I.7</i>    | <i>57</i>    | <i>Deletion of TC</i>   |                   | <i>0.008</i>           | 0.010                                            |
| 5'FR Exon I.f        | -725         | G→A                     |                   | 0.092                  | 0.135                                            |
| 5'FR Exon I.f        | -690         | A→C                     |                   | 0.092                  | 0.135                                            |
| <b>5'FR Exon I.f</b> | <b>-649</b>  | <b>C→T</b>              |                   | <b>0.942</b>           | 0.923                                            |
| Exon I.f             | -64          | C→T                     |                   | 0.000                  | 0.019                                            |
| Exon I.f             | -35          | A→G                     |                   | 0.000                  | 0.019                                            |
| 5'FR Exon I.2        | -827         | A→G                     |                   | 0.000                  | 0.010                                            |
| <b>5'FR Exon I.2</b> | <b>-596</b>  | <b>T→C</b>              |                   | <b>0.125</b>           | 0.163                                            |

|                      |             |                      |                      |              |       |
|----------------------|-------------|----------------------|----------------------|--------------|-------|
| <b>Exon I.2</b>      | <b>-224</b> | <b>G→C</b>           |                      | <b>0.450</b> | 0.490 |
| 5'FR Exon I.6        | -273        | T→A                  |                      | 0.008        | 0.000 |
| <b>5'FR Exon I.6</b> | <b>-196</b> | <b>A→C</b>           |                      | <b>0.608</b> | 0.423 |
| <b>Exon I.6</b>      | <b>-77</b>  | <b>G→A</b>           |                      | <b>0.117</b> | 0.490 |
| Intron I.6           | 61          | C→T                  |                      | 0.025        | 0.087 |
| Exon PII             | -83         | C→A                  |                      | 0.008        | 0.000 |
| <b>Intron 2</b>      | <b>-59</b>  | <b>A→G</b>           |                      | <b>0.542</b> | 0.442 |
| Exon 3               | 186         | C→T                  |                      | 0.008        | 0.000 |
| <b>Exon 3</b>        | <b>240</b>  | <b>A→G</b>           |                      | <b>0.542</b> | 0.442 |
| <b>Intron 3</b>      | <b>-76</b>  | <b>A→G</b>           |                      | 0.317        | 0.442 |
| Exon 4               | 383         | A→G                  | His (128) Arg        | 0.000        | 0.010 |
| <b>Intron 4</b>      | <b>27</b>   | <b>TCT I→D</b>       |                      | <b>0.333</b> | 0.337 |
| Exon 5               | 602         | C→T                  | Thr (201) Met        | 0.050        | 0.048 |
| <b>Intron 5</b>      | <b>-16</b>  | <b>T→G</b>           |                      | <b>0.542</b> | 0.433 |
| <b>Intron 6</b>      | <b>36</b>   | <b>A→T</b>           |                      | <b>0.542</b> | 0.433 |
| <b>Intron 6</b>      | <b>-106</b> | <b>T→G</b>           |                      | <b>0.542</b> | 0.442 |
| <b>Exon 7</b>        | <b>790</b>  | <b>C→T</b>           | <b>Arg (264) Cys</b> | <b>0.025</b> | 0.029 |
| <b>Intron 7</b>      | <b>26</b>   | <b>C→T</b>           |                      | <b>0.100</b> | 0.067 |
| <i>Intron 7</i>      | <i>101</i>  | <i>deletion of T</i> |                      | <i>0.025</i> | 0.019 |
| <i>Intron 7</i>      | <i>106</i>  | <i>A→G</i>           |                      | <i>0.033</i> | 0.029 |
| <i>Intron 7</i>      | <i>118</i>  | <i>A→C</i>           |                      | <i>0.500</i> | 0.442 |
| <i>Intron 7</i>      | <i>290</i>  | <i>G→A</i>           |                      | <i>0.025</i> | 0.038 |
| <b>Intron 7</b>      | <b>-79</b>  | <b>A→G</b>           |                      | <b>0.542</b> | 0.442 |

|                 |             |            |              |       |
|-----------------|-------------|------------|--------------|-------|
| <i>Intron 8</i> | <i>-53</i>  | <i>T→G</i> | <i>0.525</i> | 0.442 |
| 3'UTR           | 1527        | T→C        | 0.000        | 0.010 |
| <b>3'UTR</b>    | <b>1531</b> | <b>C→T</b> | <b>0.558</b> | 0.442 |
| <b>3'UTR</b>    | <b>1673</b> | <b>G→T</b> | <b>0.292</b> | 0.212 |

**Supplementary Table 4.** Human *CYP19* gene resequencing. Locations of polymorphisms, alterations in nucleotide and amino acid sequences, as well as observed minor allele frequencies for each SNP are listed. The numbering of polymorphisms in individual noncoding exon 1s and upstream 5'-FRs is based on their distance from the 3'-splice junction for that exon. Negative or positive numbers are located 5' or 3' to this position, respectively. Letters represent individual upstream noncoding exons. Numbering of polymorphisms in coding exons 2-10 and downstream of the 3'-UTR begins from the "A" in the translation initiation codon in exon 2. Variant nucleotides in introns are numbered based on their distance to the nearest splice site, with positive numbers for 3' and negative numbers for 5' splice site. Rs numbers are listed when they have been assigned. Those SNPs present in dbSNP are "highlighted". SNPs identified during the present resequencing study using Coriell DNA samples are italicized.

**Supplementary Figure 1.** Distribution of phenotypes for breast cancer patients. These phenotypes were described in a previous study (5).

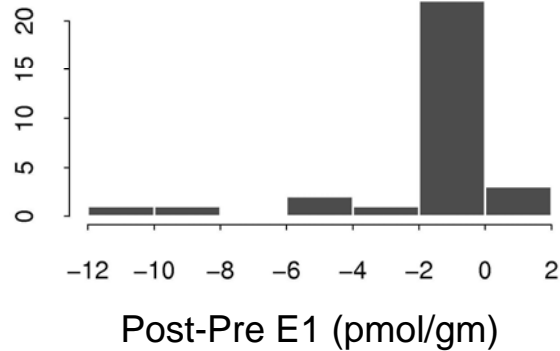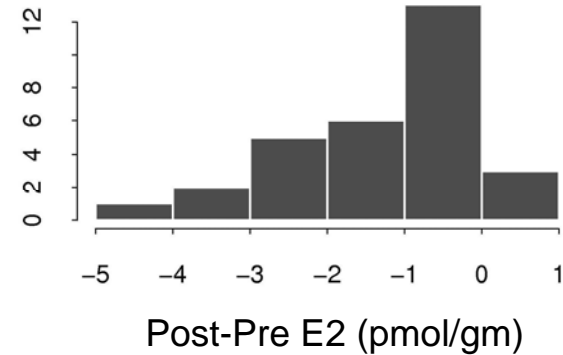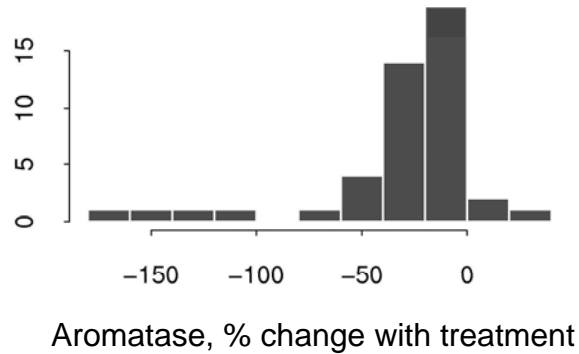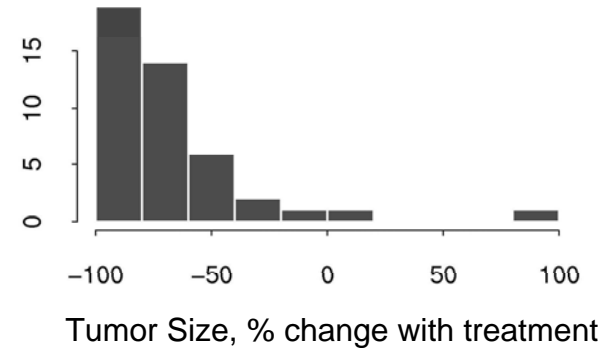

Supplement: NIHMS157920-supplement-1.pdf [file NIHMS157920-supplement-1.pdf]
